# Supplementary material for: Azobenzene-containing liquid crystalline polyester with π–π interactions: diverse thermo- and photo-responsive behaviours
Source: Royal Society of Chemistry journal article supplement (doi:10.1039/c6tc05493e), 2017-01-01
Supplement: c6tc05493e1.pdf [file c6tc05493e1.pdf]

## SUPPORTING INFORMATION

### Azobenzene-containing liquid crystalline polyester with $\pi$ - $\pi$ interactions: Diverse thermo- and photo-responsive behaviours

Hai-Yi Zhong, Li Chen,\* Rong Yang, Zhi-Ying Meng, Xiao-Min Ding, Xiao-Feng Liu and Yu-Zhong Wang\*

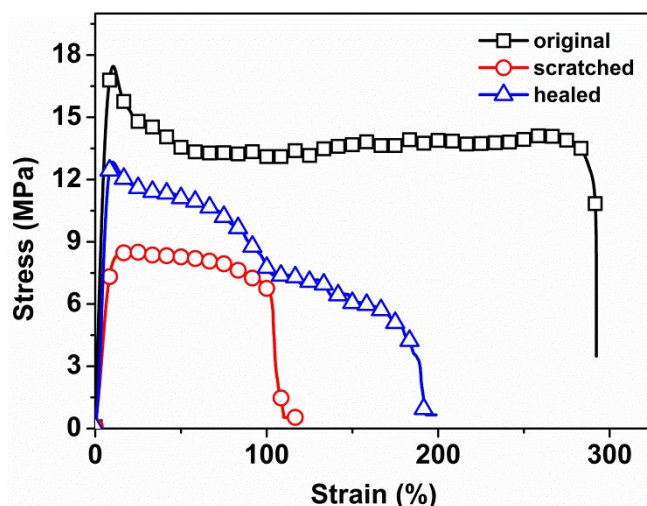

**Fig. S1** Stress versus strain curves for the original, scratched and healed state of PBHPS. The tensile stress of the original PBHSP was 17.5 MPa; and the scratched one decreased to 8.5 MPa, where the testing sample fractured precisely at the scratch trace. After 5 hours healing process at 60 °C and without the compression stress, the tensile stress of the healed one could recover to 12.8 MPa, thus the healing efficiency was 73.5% (strength) and 66.3% (elongation)<sup>1</sup>.

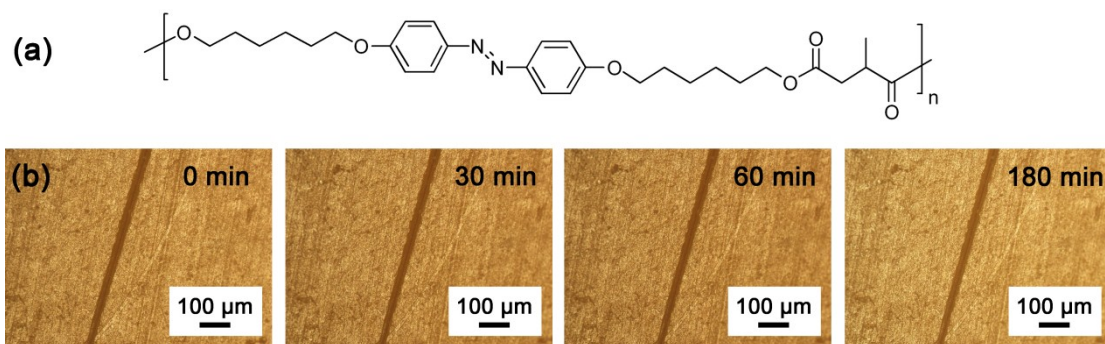

**Fig. S2** (a) Chemical structure of poly(4,4'-bis(6-hydroxyhexyloxy)azobenzene methylsuccinate) (PBHMS). (b) Unsuccessful self-healing process of PBHMS at 60 °C under the POM. After isothermal process at 60 °C for 180 min, the scratched film remained un-healed.

**Reference:**

- 1 R. P. Wool and K. M. O'Connor. A theory of crack healing in polymers. *J. Appl. Phys.*, 1981, **52**, 5953.
